# Supplementary material
Source: Springer Nature journal article supplement (http://www.springermedizin.de/resource/supplementary/12933_2010_285_MOESM6_ESM.pdf/9540024)

**A**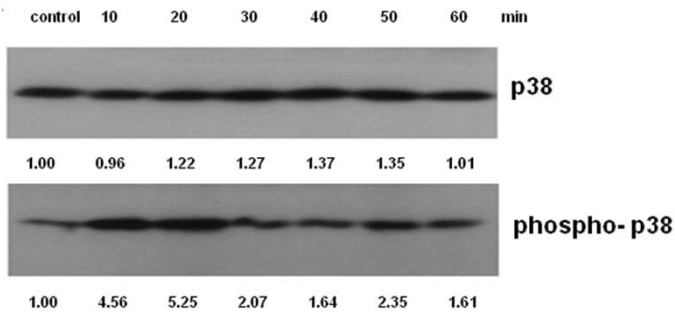**B**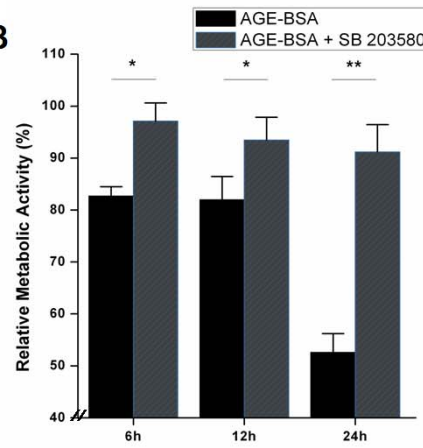**F**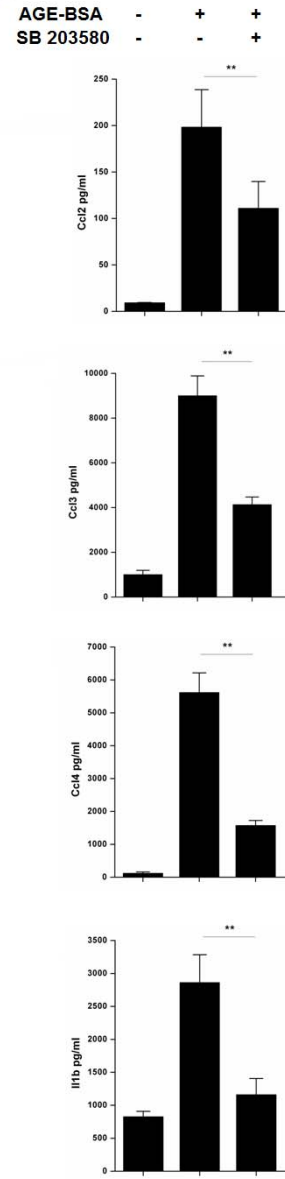**C**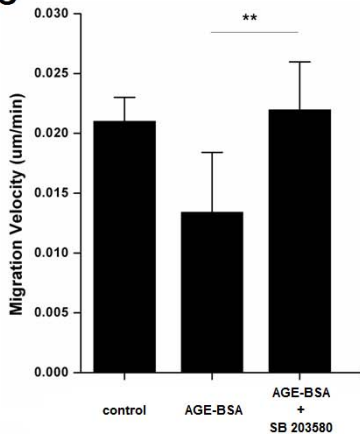**D**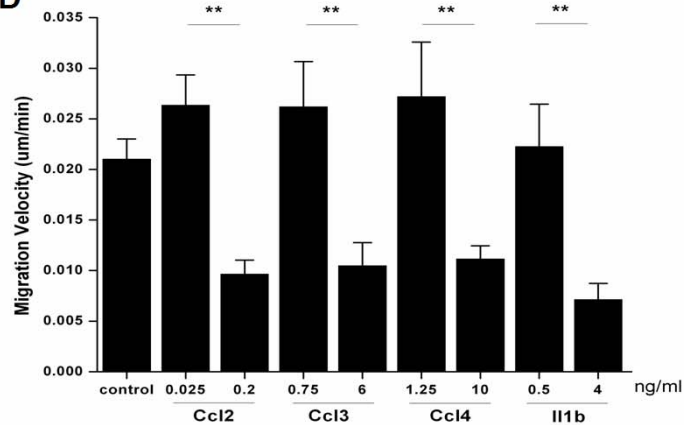**E**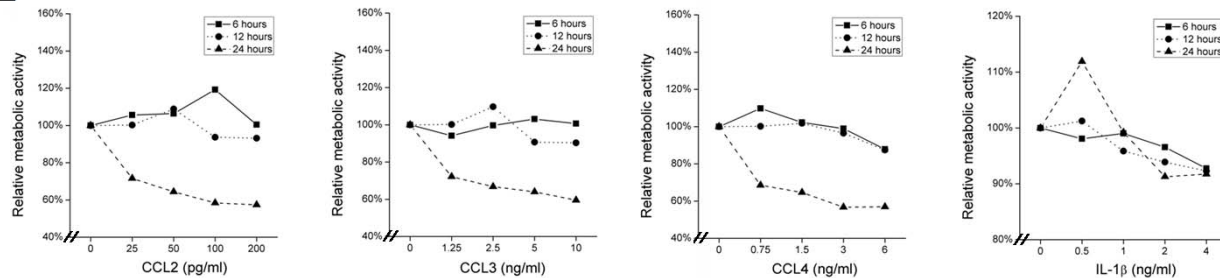

Supplement: MOESM6 [file 9540024]
